# Supplementary material
Source: PubMed Central journal article supplement (PMC7453891)
Supplement: jciinsight-5-138829-s090.pdf [file jciinsight-5-138829-s090.pdf]

## Supplemental Data

for

Li et al,

### **A *Pole*<sup>P286R</sup> mouse model of endometrial cancer recapitulates high mutational burden and immunotherapy response**

Figure S1. Histologic features of *Pole*<sup>P286R/+</sup> endometrial cancers.

Figure S2. Validation of Msh2 inactivation by IHC against MMR components.

Figure S3. Copy number plots from WGS data (representative individual samples).

Figure S4. Degree of T cell receptor diversity and clonal expansion.

Table S1. Codon substitution tables for nonsynonymous mutations across *Pole*<sup>P286R/+</sup> and *Pole*<sup>P286R/+</sup>; *Msh2*<sup>-/-</sup> cell lines and tumors (n=6 per genotype).

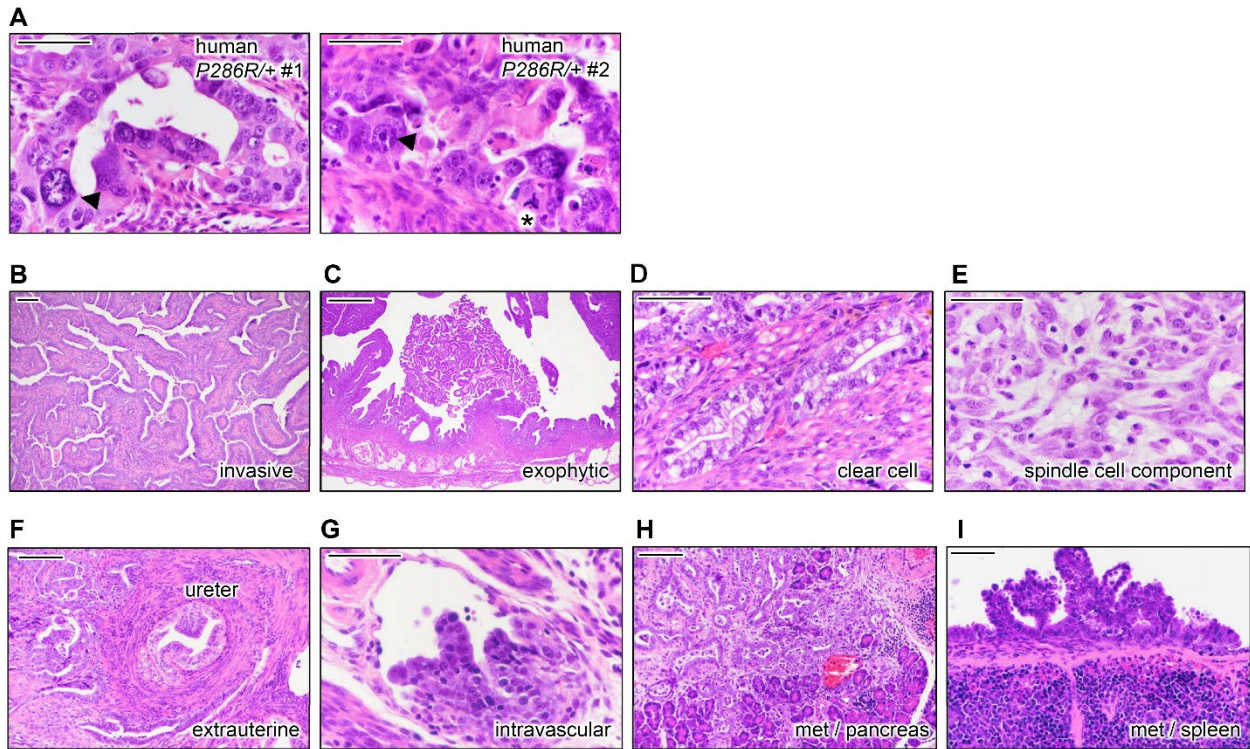

**Figure S1. Histologic features of *Pole*<sup>P286R/+</sup> endometrial cancers.** A) Two human *POLE*<sup>P286R/+</sup> endometrial cancers identified by exon 9 Sanger sequencing. B-F) Various histologic patterns in *Pole*<sup>P286R/+</sup> mouse tumors. B) Highly invasive endometrioid adenocarcinoma that did not form glands. C) Exophytic growth pattern. D) Clear cell pattern. E) Spindle cell component consistent with carcinosarcoma. F-I) Patterns and extent of invasion. F) Peri-ureteral invasion. G) Lymphovascular space invasion. H) Metastasis to pancreas. I) Metastasis to splenic capsule. Bars A, D, E, G=50 microns; B, F, H, I=100 microns; C=500 microns.

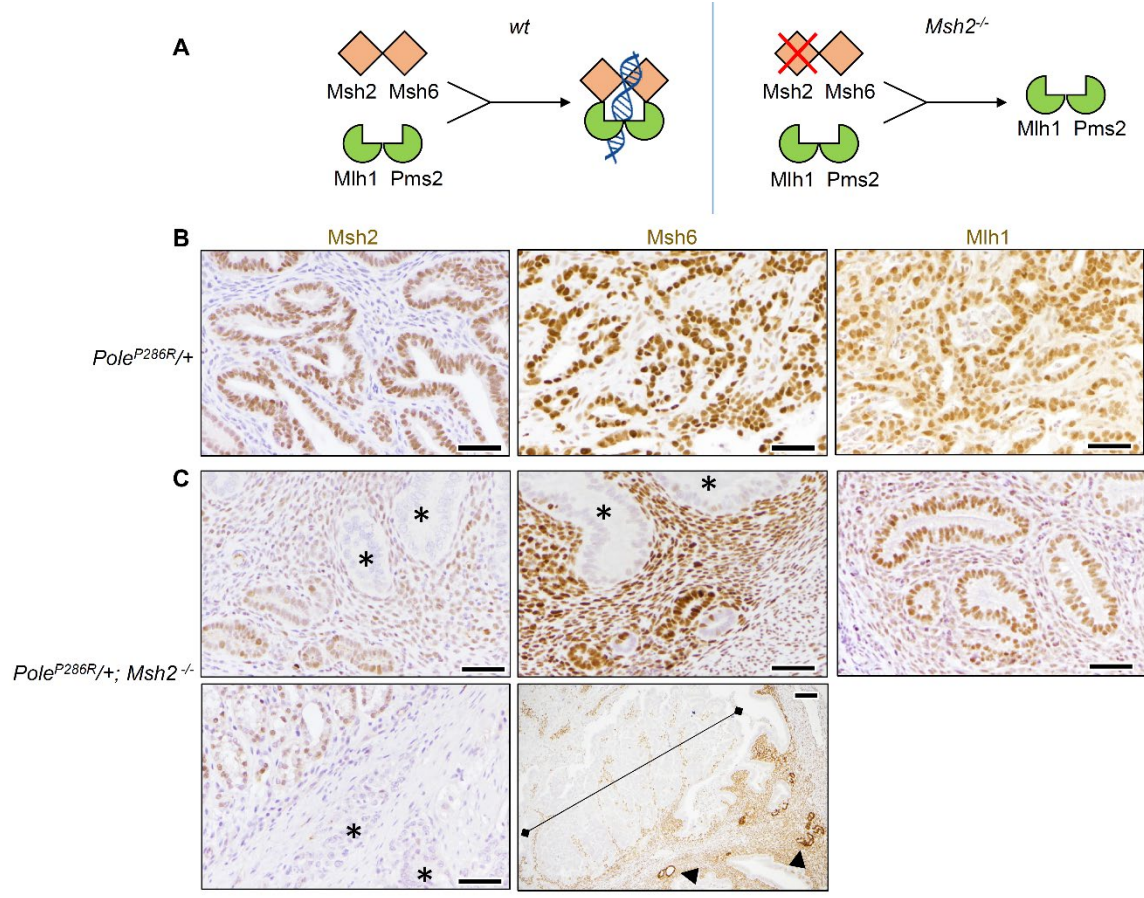

**Figure S2. Validation of Msh2 inactivation by IHC against MMR components.** A) Schematic of MMR factors. Msh2/Msh6 form a dimer where inactivation of either component leads to destabilization/degradation of both components. B) *Pole<sup>P286R/+</sup>* tumors, no dMMR as evidenced by retained expression of MMR factors Msh2, Msh6, and Mlh1. C) *Pole<sup>P286R/+</sup>; Msh2<sup>-/-</sup>* uteri at euthanasia due to tumor-burden criteria (230-288 days of age) exhibit mosaic loss of Msh2/Msh6 (asterisks) as expected, with complete loss in invasive cancers (bottom panels). Bottom panels are of a metastasis to the colon (left) and a primary endometrial cancer (right). Normal colonic epithelium (upper left side) expresses Msh2, whereas metastatic glands invading colon wall (lower right, asterisks) do not. The endometrial cancer (demarcated with a line) shows loss of expression (but retention in rare *wt* normal glands, arrowheads). Bar=50 microns in all panels except lower Msh6 panel, bar=100 microns.

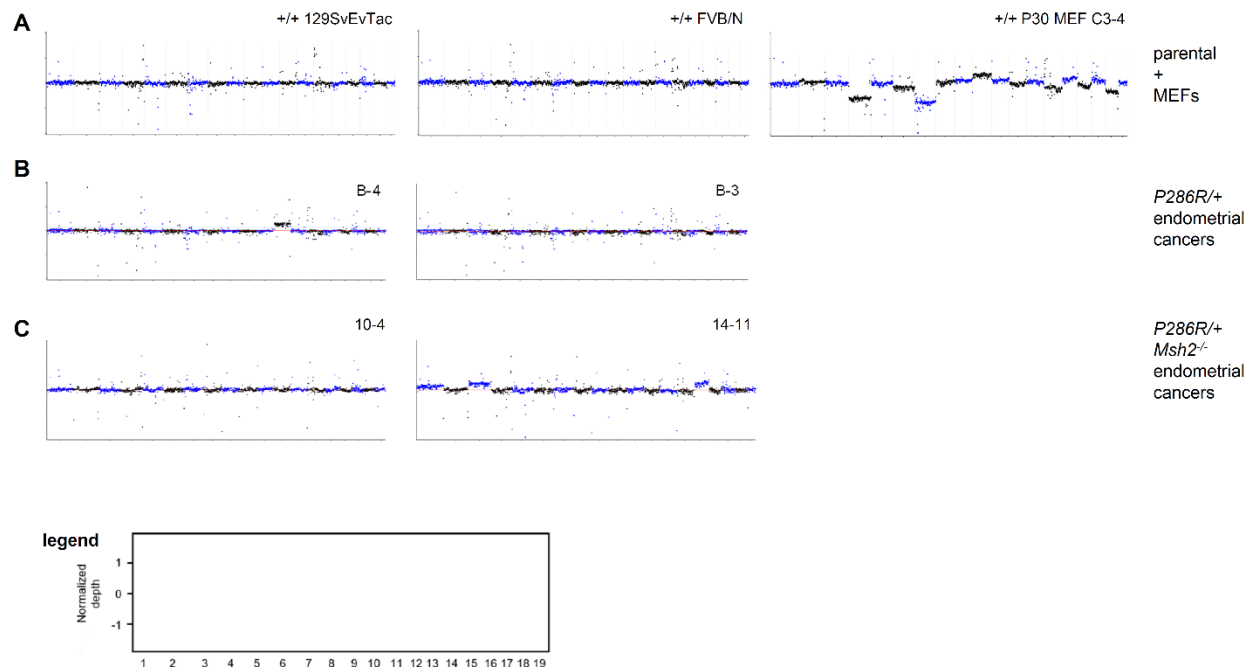

**Figure S3. Copy number plots from WGS data (representative individual samples).** For each sample y-axis represents normalized depth ( $\log_2(\text{depth}/\text{median depth across genome})$ ). The x-axis represents position among the 19 autosomes as illustrated. A) Control samples including parental 129SvEvTac and FVB mouse DNA and +/+ passage 30 mouse embryo fibroblast line. The analysis shows that some large-scale chromosomal instability occurs during immortalization and serial passage of wild-type fibroblasts. B) Two *Pole*<sup>P286R/+</sup> primary tumors from different mice (additional examples to tumor shown in Figure 4C). C) Two additional *Pole*<sup>P286R/+</sup>; *Msh2*<sup>-/-</sup> primary tumors (additional examples to tumor shown in Figure 4C). The analysis shows that neither *Pole*<sup>P286R</sup> by itself or together with *Msh2* deficiency results in prominent large-scale chromosomal instability; only small numbers of events are detected.

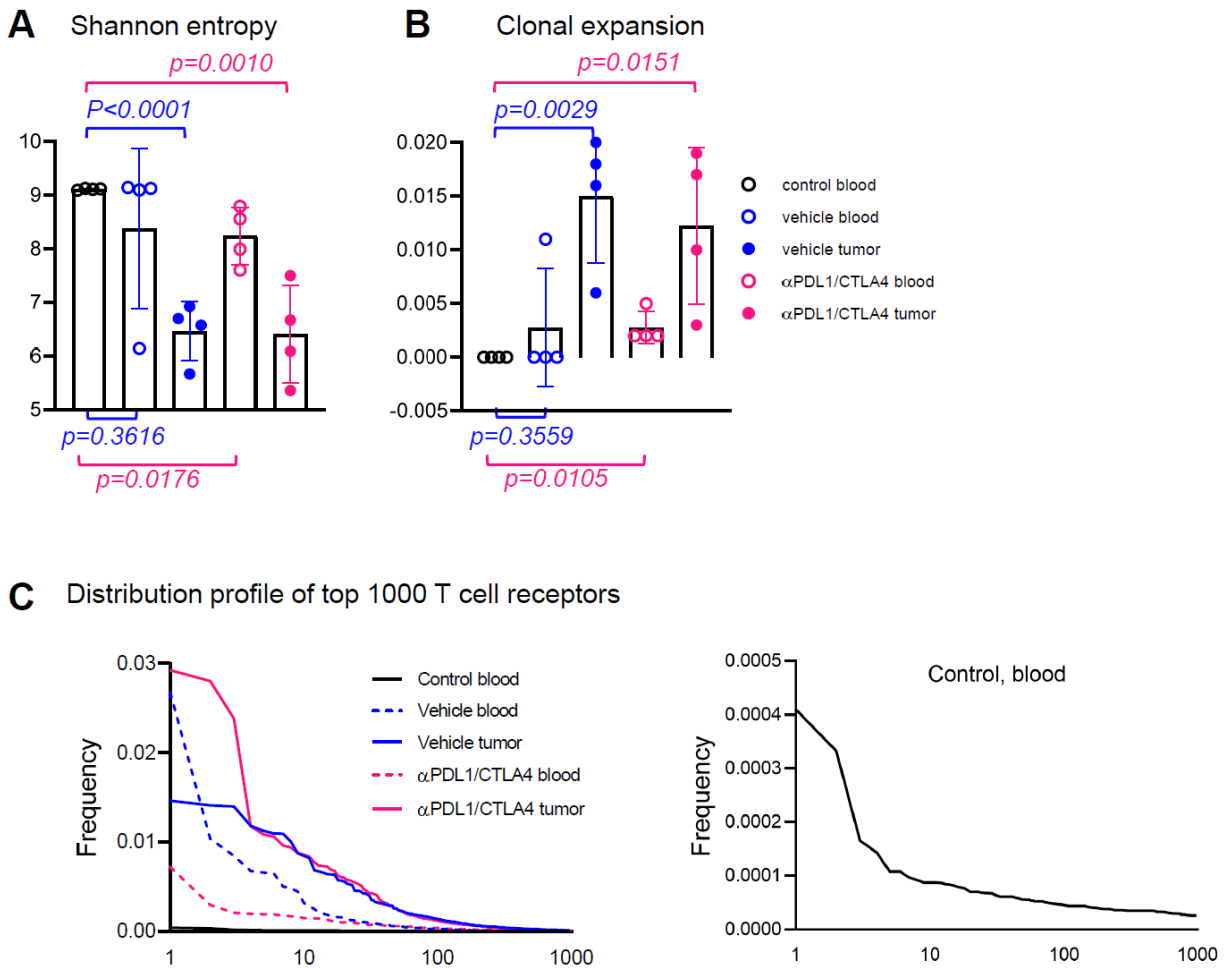

**Figure S4. Degree of T cell receptor diversity and clonal expansion.** A) Shannon entropy index assess T cell receptor diversity. The higher entropy index reflects higher TCR diversity,  $n=4$ . B) Clonality as a measure of how evenly TCR sequences are distributed. Clonality ranges from 0.0 to 1.0, where 0.0 represents a completely even sample and 1.0 represents a sample with a single dominant clone,  $n=4$  (1). C) Distribution profile of top 1000 T cell receptor sequences in each group, x-axis=TCR clone number, from top 1 to top 1000. Since there is no T cell receptor expansion in peripheral blood from control mice without tumor grafts, T cell receptor frequency of control blood is also shown separately on right.

1. Immunoseq.  
[https://clients.adaptivebiotech.com/assets/downloads/immunoSEQ\\_AnalyzerManual.pdf](https://clients.adaptivebiotech.com/assets/downloads/immunoSEQ_AnalyzerManual.pdf).  
 Accessed March 8, 2020.
